# Supplementary material for: Impact of Positive Lymph Nodes and Resection Margin Status on the Overall Survival of Patients with Resected Perihilar Cholangiocarcinoma: The ENSCCA Registry
Source: MDPI journal article supplement (doi:10.3390/cancers14102389), 2022-05-12
Supplement: s1 [file s1]

Table S1: Factors independently associated with positive lymph nodes on uni and multivariable logistic regression analysis.

|                                | Univariable analysis |                              | Multivariable analysis |                             |
|--------------------------------|----------------------|------------------------------|------------------------|-----------------------------|
|                                | OR (95% CI)          | <i>P</i> value <sup>\$</sup> | OR (95% CI)            | <i>P</i> value <sup>#</sup> |
| Age at surgery                 | 0.98 (0.96 – 1.00)   | <b>0.102</b>                 | 0.98 (0.96 – 1.01)     | 0.108                       |
| Tumor size >2.5cm              | 1.62 (0.92 – 2.85)   | <b>0.097</b>                 | 1.56 (0.88 – 2.76)     | 0.129                       |
| ECOG performance status        |                      |                              |                        |                             |
| ECOG 0                         | Reference            |                              |                        |                             |
| ECOG 1                         | 1.20 (0.68 – 2.13)   | 0.528                        |                        |                             |
| ECOG 2                         | 0.85 (0.28 – 2.56)   | 0.774                        |                        |                             |
| ECOG 3                         | 0.68 (0.07 – 6.72)   | 0.742                        |                        |                             |
| Tumor differentiation          |                      |                              |                        |                             |
| Well differentiated (G1)       | 0.62 (0.29 – 1.33)   | 0.221                        |                        |                             |
| Moderately differentiated (G2) | Reference            |                              |                        |                             |
| Poorly differentiated (G3)     | 0.72 (0.38 – 1.36)   | 0.311                        |                        |                             |
